# Supplementary material for: Cellular Response to Ciprofloxacin in Low-Level Quinolone-Resistant Escherichia coli
Source: PubMed Central journal article supplement (PMC5516121; doi:10.3389/fmicb.2017.01370), 2017-07-19
Supplement: Table_3.pdf [file Table_3.pdf]

|     |        |       |       |       |     |       |     |          |          |           |           |             |      |                                       |
|-----|--------|-------|-------|-------|-----|-------|-----|----------|----------|-----------|-----------|-------------|------|---------------------------------------|
| hba | 4.38   | 11.57 | 2.19  | 12.51 | 0.1 | 18.40 | 0.2 | 0.000008 | 0.000181 | 0.000028  | 0.0204776 | A_07_P04884 | 3228 | cm1(phenylalanine tRNA synthetase)    |
| hbc | 3.98   | 10.45 | 1.99  | 11.55 | 0.1 | 16.56 | 0.2 | 0.000006 | 0.000267 | 0.0001139 | 0.0240073 | A_07_P04885 | 3231 | cm1(hydrophobic protein S215)         |
| hbd | 2.12   | 6.77  | 1.17  | 7.84  | 0.1 | 11.22 | 0.2 | 0.000002 | 0.000095 | 0.000037  | 0.007977  | A_07_P04886 | 3234 | cm1(hydrophobic protein S216)         |
| hbe | 2.04   | 12.24 | 1.54  | 13.04 | 0.1 | 11.44 | 0.4 | 0.000469 | 0.000730 | 0.0214877 | 0.0227490 | A_07_P04887 | 3234 | cm1(hydrophobic protein S214)         |
| hbf | 4.81   | 8.31  | 1.61  | 9.21  | 0.1 | 12.48 | 0.4 | 0.000000 | 0.000000 | 0.000000  | 0.000000  | A_07_P04888 | 3235 | cm1(hydrophobic protein S217)         |
| hbg | +1.65  | 10.78 | -2.94 | 9.11  | 0.1 | 11.24 | 0.4 | 0.000029 | 0.000166 | 0.0004319 | 0.0204889 | A_07_P04889 | 3242 | cm1(serine hydrophobic protein S1842) |
| hbi | +4.61  | 8.21  | 1.61  | 9.21  | 0.1 | 12.08 | 0.2 | 0.000000 | 0.000000 | 0.000000  | 0.000000  | A_07_P04890 | 3112 | cm1(serine hydrophobic protein S1843) |
| hbj | -29.09 | 11.37 | +1.59 | 10.97 | 0.1 | 13.64 | 0.4 | 0.000002 | 0.000176 | 0.0000205 | 0.0454824 | A_07_P04891 | 3217 | cm1(serine hydrophobic protein S1844) |
| hbk | 2.69   | 8.46  | 1.71  | 9.21  | 0.1 | 12.08 | 0.2 | 0.000000 | 0.000000 | 0.000000  | 0.000000  | A_07_P04892 | 3218 | cm1(serine hydrophobic protein S1845) |
| hbl | -2.26  | 11.92 | -1.39 | 12.11 | 0.1 | 11.32 | 0.2 | 0.000000 | 0.000000 | 0.000000  | 0.000000  | A_07_P04893 | 3219 | cm1(serine hydrophobic protein S1846) |
| hbm | 2.24   | 8.46  | 1.71  | 9.21  | 0.1 | 12.08 | 0.2 | 0.000000 | 0.000000 | 0.000000  | 0.000000  | A_07_P04894 | 3220 | cm1(serine hydrophobic protein S1847) |
| hbn | 2.31   | 8.46  | 1.71  | 9.21  | 0.1 | 12.08 | 0.2 | 0.000000 | 0.000000 | 0.000000  | 0.000000  | A_07_P04895 | 3221 | cm1(serine hydrophobic protein S1848) |
| hbo | 2.24   | 8.46  | 1.71  | 9.21  | 0.1 | 12.08 | 0.2 | 0.000000 | 0.000000 | 0.000000  | 0.000000  | A_07_P04896 | 3222 | cm1(serine hydrophobic protein S1849) |
| hbp | +1.65  | 10.78 | -2.94 | 9.11  | 0.1 | 11.24 | 0.4 | 0.000029 | 0.000166 | 0.0004319 | 0.0204889 | A_07_P04897 | 3242 | cm1(serine hydrophobic protein S1842) |
| hbr | +1.65  | 10.78 | -2.94 | 9.11  | 0.1 | 11.24 | 0.4 | 0.000029 | 0.000166 | 0.0004319 | 0.0204889 | A_07_P04898 | 3243 | cm1(serine hydrophobic protein S1843) |
| hbs | +4.25  | 10.48 | 1.88  | 11.48 | 0.1 | 11.08 | 0.1 | 0.000000 | 0.000000 | 0.000000  | 0.000000  | A_07_P04899 | 3244 | cm1(serine hydrophobic protein S1844) |
| hbt | -2.68  | 12.74 | -1.42 | 13.45 | 0.4 | 11.08 | 0.1 | 0.000442 | 0.000489 | 0.0150452 | 0.0718205 | A_07_P04900 | 3245 | cm1(serine hydrophobic protein S1845) |
| hbu | 2.24   | 8.46  | 1.71  | 9.21  | 0.1 | 12.08 | 0.2 | 0.000000 | 0.000000 | 0.000000  | 0.000000  | A_07_P04901 | 3246 | cm1(serine hydrophobic protein S1846) |
| hbv | 2.24   | 8.46  | 1.71  | 9.21  | 0.1 | 12.08 | 0.2 | 0.000000 | 0.000000 | 0.000000  | 0.000000  | A_07_P04902 | 3247 | cm1(serine hydrophobic protein S1847) |
| hbw | 2.24   | 8.46  | 1.71  | 9.21  | 0.1 | 12.08 | 0.2 | 0.000000 | 0.000000 | 0.000000  | 0.000000  | A_07_P04903 | 3248 | cm1(serine hydrophobic protein S1848) |
| hbx | 2.24   | 8.46  | 1.71  | 9.21  | 0.1 | 12.08 | 0.2 | 0.000000 | 0.000000 | 0.000000  | 0.000000  | A_07_P04904 | 3249 | cm1(serine hydrophobic protein S1849) |
| hby | +1.65  | 10.78 | -2.94 | 9.11  | 0.1 | 11.24 | 0.4 | 0.000029 | 0.000166 | 0.0004319 | 0.0204889 | A_07_P04905 | 3250 | cm1(serine hydrophobic protein S1842) |
| hbz | +1.65  | 10.78 | -2.94 | 9.11  | 0.1 | 11.24 | 0.4 | 0.000029 | 0.000166 | 0.0004319 | 0.0204889 | A_07_P04906 | 3251 | cm1(serine hydrophobic protein S1843) |
| hca | 2.24   | 8.46  | 1.71  | 9.21  | 0.1 | 12.08 | 0.2 | 0.000000 | 0.000000 | 0.000000  | 0.000000  | A_07_P04907 | 3252 | cm1(serine hydrophobic protein S1844) |
| hcb | 2.24   | 8.46  | 1.71  | 9.21  | 0.1 | 12.08 | 0.2 | 0.000000 | 0.000000 | 0.000000  | 0.000000  | A_07_P04908 | 3253 | cm1(serine hydrophobic protein S1845) |
| hcc | 2.24   | 8.46  | 1.71  | 9.21  | 0.1 | 12.08 | 0.2 | 0.000000 | 0.000000 | 0.000000  | 0.000000  | A_07_P04909 | 3254 | cm1(serine hydrophobic protein S1846) |
| hcd | 2.24   | 8.46  | 1.71  | 9.21  | 0.1 | 12.08 | 0.2 | 0.000000 | 0.000000 | 0.000000  | 0.000000  | A_07_P04910 | 3255 | cm1(serine hydrophobic protein S1847) |
| hce | 2.24   | 8.46  | 1.71  | 9.21  | 0.1 | 12.08 | 0.2 | 0.000000 | 0.000000 | 0.000000  | 0.000000  | A_07_P04911 | 3256 | cm1(serine hydrophobic protein S1848) |
| hcf | 2.24   | 8.46  | 1.71  | 9.21  | 0.1 | 12.08 | 0.2 | 0.000000 | 0.000000 | 0.000000  | 0.000000  | A_07_P04912 | 3257 | cm1(serine hydrophobic protein S1849) |
| hcg | 2.24   | 8.46  | 1.71  | 9.21  | 0.1 | 12.08 | 0.2 | 0.000000 | 0.000000 | 0.000000  | 0.000000  | A_07_P04913 | 3258 | cm1(serine hydrophobic protein S1844) |
| hch | 2.24   | 8.46  | 1.71  | 9.21  | 0.1 | 12.08 | 0.2 | 0.000000 | 0.000000 | 0.000000  | 0.000000  | A_07_P04914 | 3259 | cm1(serine hydrophobic protein S1845) |
| hci | 2.24   | 8.46  | 1.71  | 9.21  | 0.1 | 12.08 | 0.2 | 0.000000 | 0.000000 | 0.000000  | 0.000000  | A_07_P04915 | 3260 | cm1(serine hydrophobic protein S1846) |
| hcl | 2.24   | 8.46  | 1.71  | 9.21  | 0.1 | 12.08 | 0.2 | 0.000000 | 0.000000 | 0.000000  | 0.000000  | A_07_P04916 | 3261 | cm1(serine hydrophobic protein S1847) |
| hcm | 2.24   | 8.46  | 1.71  | 9.21  | 0.1 | 12.08 | 0.2 | 0.000000 | 0.000000 | 0.000000  | 0.000000  | A_07_P04917 | 3262 | cm1(serine hydrophobic protein S1848) |
| hcn | 2.24   | 8.46  | 1.71  | 9.21  | 0.1 | 12.08 | 0.2 | 0.000000 | 0.000000 | 0.000000  | 0.000000  | A_07_P04918 | 3263 | cm1(serine hydrophobic protein S1849) |
| hco | 2.24   | 8.46  | 1.71  | 9.21  | 0.1 | 12.08 | 0.2 | 0.000000 | 0.000000 | 0.000000  | 0.000000  | A_07_P04919 | 3264 | cm1(serine hydrophobic protein S1844) |
| hcp | 2.24   | 8.46  | 1.71  | 9.21  | 0.1 | 12.08 | 0.2 | 0.000000 | 0.000000 | 0.000000  | 0.000000  | A_07_P04920 | 3265 | cm1(serine hydrophobic protein S1845) |
| hcq | 2.24   | 8.46  | 1.71  | 9.21  | 0.1 | 12.08 | 0.2 | 0.000000 | 0.000000 | 0.000000  | 0.000000  | A_07_P04921 | 3266 | cm1(serine hydrophobic protein S1846) |
| hcq | 2.24   | 8.46  | 1.71  | 9.21  | 0.1 | 12.08 | 0.2 | 0.000000 | 0.000000 | 0.000000  | 0.000000  | A_07_P04922 | 3267 | cm1(serine hydrophobic protein S1847) |
| hcr | 2.24   | 8.46  | 1.71  | 9.21  | 0.1 | 12.08 | 0.2 | 0.000000 | 0.000000 | 0.000000  | 0.000000  | A_07_P04923 | 3268 | cm1(serine hydrophobic protein S1848) |
| hcs | 2.24   | 8.46  | 1.71  | 9.21  | 0.1 | 12.08 | 0.2 | 0.000000 | 0.000000 | 0.000000  | 0.000000  | A_07_P04924 | 3269 | cm1(serine hydrophobic protein S1849) |
| hct | 2.24   | 8.46  | 1.71  | 9.21  | 0.1 | 12.08 | 0.2 | 0.000000 | 0.000000 | 0.000000  | 0.000000  | A_07_P04925 | 3270 | cm1(serine hydrophobic protein S1844) |
| hcu | 2.24   | 8.46  | 1.71  | 9.21  | 0.1 | 12.08 | 0.2 | 0.000000 | 0.000000 | 0.000000  | 0.000000  | A_07_P04926 | 3271 | cm1(serine hydrophobic protein S1845) |
| hcv | 2.24   | 8.46  | 1.71  | 9.21  | 0.1 | 12.08 | 0.2 | 0.000000 | 0.000000 | 0.000000  | 0.000000  | A_07_P04927 | 3272 | cm1(serine hydrophobic protein S1846) |
| hcw | 2.24   | 8.46  | 1.71  | 9.21  | 0.1 | 12.08 | 0.2 | 0.000000 | 0.000000 | 0.000000  | 0.000000  | A_07_P04928 | 3273 | cm1(serine hydrophobic protein S1847) |
| hcx | 2.24   | 8.46  | 1.71  | 9.21  | 0.1 | 12.08 | 0.2 | 0.000000 | 0.000000 | 0.000000  | 0.000000  | A_07_P04929 | 3274 | cm1(serine hydrophobic protein S1848) |
| hcy | 2.24   | 8.46  | 1.71  | 9.21  | 0.1 | 12.08 | 0.2 | 0.000000 | 0.000000 | 0.000000  | 0.000000  | A_07_P04930 | 3275 | cm1(serine hydrophobic protein S1849) |
| hcz | 2.24   | 8.46  | 1.71  | 9.21  | 0.1 | 12.08 | 0.2 | 0.000000 | 0.000000 | 0.000000  | 0.000000  | A_07_P04931 | 3276 | cm1(serine hydrophobic protein S1844) |
| hda | 2.24   | 8.46  | 1.71  | 9.21  | 0.1 | 12.08 | 0.2 | 0.000000 | 0.000000 | 0.000000  | 0.000000  | A_07_P04932 | 3277 | cm1(serine hydrophobic protein S1845) |
| hdb | 2.24   | 8.46  | 1.71  | 9.21  | 0.1 | 12.08 | 0.2 | 0.000000 | 0.000000 | 0.000000  | 0.000000  | A_07_P04933 | 3278 | cm1(serine hydrophobic protein S1846) |
| hdc | 2.24   | 8.46  | 1.71  | 9.21  | 0.1 | 12.08 | 0.2 | 0.000000 | 0.000000 | 0.000000  | 0.000000  | A_07_P04934 | 3279 | cm1(serine hydrophobic protein S1847) |
| hdd | 2.24   | 8.46  | 1.71  | 9.21  | 0.1 | 12.08 | 0.2 | 0.000000 | 0.000000 | 0.000000  | 0.000000  | A_07_P04935 | 3280 | cm1(serine hydrophobic protein S1848) |
| hde | 2.24   | 8.46  | 1.71  | 9.21  | 0.1 | 12.08 | 0.2 | 0.000000 | 0.000000 | 0.000000  | 0.000000  | A_07_P04936 | 3281 | cm1(serine hydrophobic protein S1849) |
| hdf | 2.24   | 8.46  | 1.71  | 9.21  | 0.1 | 12.08 | 0.2 | 0.000000 | 0.000000 | 0.000000  | 0.000000  | A_07_P04937 | 3282 | cm1(serine hydrophobic protein S1844) |
| hdf | 2.24   | 8.46  | 1.71  | 9.21  | 0.1 | 12.08 | 0.2 | 0.000000 | 0.000000 | 0.000000  | 0.000000  | A_07_P04938 | 3283 | cm1(serine hydrophobic protein S1845) |
| hdg | 2.24   | 8.46  | 1.71  | 9.21  | 0.1 | 12.08 | 0.2 | 0.000000 | 0.000000 | 0.000000  | 0.000000  | A_07_P04939 | 3284 | cm1(serine hydrophobic protein S1846) |
| hdh | 2.24   | 8.46  | 1.71  | 9.21  | 0.1 | 12.08 | 0.2 | 0.000000 | 0.000000 | 0.000000  | 0.000000  | A_07_P04940 | 3285 | cm1(serine hydrophobic protein S1847) |
| hdi | 2.24   | 8.46  | 1.71  | 9.21  | 0.1 | 12.08 | 0.2 | 0.000000 | 0.000000 | 0.000000  | 0.000000  | A_07_P04941 | 3286 | cm1(serine hydrophobic protein S1848) |
| hdj | 2.24   | 8.46  | 1.71  | 9.21  | 0.1 | 12.08 | 0.2 | 0.000000 | 0.000000 | 0.000000  | 0.000000  | A_07_P04942 | 3287 | cm1(serine hydrophobic protein S1849) |
| hdk | 2.24   | 8.46  | 1.71  | 9.21  | 0.1 | 12.08 | 0.2 | 0.000000 | 0.000000 | 0.000000  | 0.000000  | A_07_P04943 | 3288 | cm1(serine hydrophobic protein S1844) |
| hdl | 2.24   | 8.46  | 1.71  | 9.21  | 0.1 | 12.08 | 0.2 | 0.000000 | 0.000000 | 0.000000  | 0.000000  | A_07_P04944 | 3289 | cm1(serine hydrophobic protein S1845) |
| hdm | 2.24   | 8.46  | 1.71  | 9.21  | 0.1 | 12.08 | 0.2 | 0.000000 | 0.000000 | 0.000000  | 0.000000  | A_07_P04945 | 3290 | cm1(serine hydrophobic protein S1846) |
| hdm | 2.24   | 8.46  | 1.71  | 9.21  | 0.1 | 12.08 | 0.2 | 0.000000 | 0.000000 | 0.000000  | 0.000000  | A_07_P04946 | 3291 | cm1(serine hydrophobic protein S1847) |
| hdn | 2.24   | 8.46  | 1.71  | 9.21  | 0.1 | 12.08 | 0.2 | 0.000000 | 0.000000 | 0.000000  | 0.000000  | A_07_P04947 | 3292 | cm1(serine hydrophobic protein S1848) |
| hdo | 2.24   | 8.46  | 1.71  | 9.21  | 0.1 | 12.08 | 0.2 | 0.000000 | 0.000000 | 0.000000  | 0.000000  | A_07_P04948 | 3293 | cm1(serine hydrophobic protein S1849) |
| hdp | 2.24   | 8.46  | 1.71  | 9.21  | 0.1 | 12.08 | 0.2 | 0.000000 | 0.000000 | 0.000000  | 0.000000  | A_07_P04949 | 3294 | cm1(serine hydrophobic protein S1844) |
| hdp | 2.24   | 8.46  | 1.71  | 9.21  | 0.1 | 12.08 | 0.2 | 0.000000 | 0.000000 | 0.        |           |             |      |                                       |







|     |       |       |       |       |     |       |          |           |           |           |           |           |           |                                |                                |
|-----|-------|-------|-------|-------|-----|-------|----------|-----------|-----------|-----------|-----------|-----------|-----------|--------------------------------|--------------------------------|
| YFH | -4.83 | 0.98  | -4.84 | 0.88  | 0.0 | 0.0   | 0.000200 | 0.000143  | 0.017233  | 0.000208  | A         | DT_P01821 | 3211      | cm1(Hypothetical protein 3211) |                                |
| YFI | 4.26  | 0.98  | -2.45 | 11.39 | 0.1 | 8.62  | 0.0      | 0.000261  | 0.0001875 | 0.014232  | 0.0148728 | A         | DT_P01823 | 3250                           | cm1(Hypothetical protein 3250) |
| YFJ | 4.87  | 0.87  | 0.88  | 0.0   | 0.0 | 0.0   | 0.000199 | 0.000143  | 0.017233  | 0.000208  | A         | DT_P01824 | 3251      | cm1(Hypothetical protein 3251) |                                |
| YFK | -4.13 | 11.53 | -2.46 | 10.29 | 0.1 | 13.86 | 0.4      | 0.000899  | 0.001004  | 0.006649  | 0.0125645 | A         | DT_P01829 | 3279                           | cm1(Hypothetical protein 3279) |
| YFL | 3.93  | 0.96  | 1.12  | 9.42  | 0.1 | 8.62  | 0.1      | 0.000146  | 0.0001098 | 0.0138079 | 0.0136615 | A         | DT_P01847 | 3293                           | cm1(Hypothetical protein 3293) |
| YFM | -7.17 | 0.96  | -2.18 | 8.17  | 0.2 | 8.62  | 0.1      | 0.000200  | 0.000143  | 0.017233  | 0.000208  | A         | DT_P01848 | 3294                           | cm1(Hypothetical protein 3294) |
| YFN | -2.26 | 11.72 | -1.17 | 12.30 | 0.1 | 13.13 | 0.3      | 0.0001217 | 0.0142000 | 0.0137272 | 0.0143800 | A         | DT_P01869 | 3318                           | cm1(Hypothetical protein 3318) |
| YFO | 2.69  | 0.94  | 1.02  | 10.84 | 0.1 | 9.83  | 0.0      | 0.0001554 | 0.0004937 | 0.0173455 | 0.0149203 | A         | DT_P01888 | 3325                           | cm1(Hypothetical protein 3325) |
| YFP | -2.02 | 10.34 | 1.02  | 10.84 | 0.1 | 9.83  | 0.0      | 0.0001554 | 0.0004937 | 0.0173455 | 0.0149203 | A         | DT_P01889 | 3326                           | cm1(Hypothetical protein 3326) |
| YFQ | 2.99  | 0.99  | 1.79  | 10.04 | 0.1 | 8.94  | 0.0      | 0.0001774 | 0.0002657 | 0.0148851 | 0.0138825 | A         | DT_P01901 | 3333                           | cm1(Hypothetical protein 3333) |
| YFR | 10.22 | 0.89  | 1.19  | 11.37 | 0.1 | 11.37 | 0.0      | 0.0001774 | 0.0002657 | 0.0148851 | 0.0138825 | A         | DT_P01902 | 3334                           | cm1(Hypothetical protein 3334) |
| YFS | 2.49  | 0.86  | 1.11  | 9.14  | 0.0 | 7.82  | 0.1      | 0.0001821 | 0.0001947 | 0.0139029 | 0.0139029 | A         | DT_P01936 | 3357                           | cm1(Hypothetical protein 3357) |
| YFT | 10.22 | 0.89  | 1.19  | 11.37 | 0.1 | 11.37 | 0.0      | 0.0001774 | 0.0002657 | 0.0148851 | 0.0138825 | A         | DT_P01937 | 3358                           | cm1(Hypothetical protein 3358) |
| YFU | -7.61 | 11.51 | -3.93 | 12.57 | 0.1 | 10.04 | 0.4      | 0.0001461 | 0.0001098 | 0.0138079 | 0.0136615 | A         | DT_P01938 | 3359                           | cm1(Hypothetical protein 3359) |
| YFV | 10.22 | 0.89  | 1.19  | 11.37 | 0.1 | 11.37 | 0.0      | 0.0001774 | 0.0002657 | 0.0148851 | 0.0138825 | A         | DT_P01939 | 3360                           | cm1(Hypothetical protein 3360) |
| YFW | 2.54  | 0.79  | 1.34  | 9.40  | 0.0 | 8.06  | 0.1      | 0.0001871 | 0.0001431 | 0.0147176 | 0.0147889 | A         | DT_P01970 | 3416                           | cm1(Hypothetical protein 3416) |
| YFX | -1.88 | 8.46  | 0.89  | 7.87  | 0.1 | 8.62  | 0.0      | 0.0001774 | 0.0002657 | 0.0148851 | 0.0138825 | A         | DT_P01971 | 3417                           | cm1(Hypothetical protein 3417) |
| YFY | -1.26 | 7.91  | -1.18 | 7.12  | 0.1 | 8.08  | 0.2      | 0.0001829 | 0.0004403 | 0.0149754 | 0.0149754 | A         | DT_P01972 | 3418                           | cm1(Hypothetical protein 3418) |
| YFZ | -2.78 | 11.79 | -1.48 | 12.53 | 0.1 | 11.86 | 0.2      | 0.0001494 | 0.0001689 | 0.0139821 | 0.0139821 | A         | DT_P01973 | 3419                           | cm1(Hypothetical protein 3419) |
| YGA | -2.84 | 7.14  | -2.84 | 7.14  | 0.2 | 8.08  | 0.2      | 0.0001494 | 0.0001689 | 0.0139821 | 0.0139821 | A         | DT_P01974 | 3420                           | cm1(Hypothetical protein 3420) |
| YGB | -3.13 | 11.79 | -1.48 | 12.53 | 0.1 | 11.86 | 0.2      | 0.0001494 | 0.0001689 | 0.0139821 | 0.0139821 | A         | DT_P01975 | 3421                           | cm1(Hypothetical protein 3421) |
| YGC | -3.13 | 11.79 | -1.48 | 12.53 | 0.1 | 11.86 | 0.2      | 0.0001494 | 0.0001689 | 0.0139821 | 0.0139821 | A         | DT_P01976 | 3422                           | cm1(Hypothetical protein 3422) |
| YGD | -3.13 | 11.79 | -1.48 | 12.53 | 0.1 | 11.86 | 0.2      | 0.0001494 | 0.0001689 | 0.0139821 | 0.0139821 | A         | DT_P01977 | 3423                           | cm1(Hypothetical protein 3423) |
| YGE | -2.88 | 10.62 | -1.06 | 11.15 | 0.1 | 10.09 | 0.1      | 0.0001494 | 0.0001689 | 0.0139821 | 0.0139821 | A         | DT_P01978 | 3424                           | cm1(Hypothetical protein 3424) |
| YGF | -2.88 | 10.62 | -1.06 | 11.15 | 0.1 | 10.09 | 0.1      | 0.0001494 | 0.0001689 | 0.0139821 | 0.0139821 | A         | DT_P01979 | 3425                           | cm1(Hypothetical protein 3425) |
| YGH | -4.79 | 10.27 | -2.23 | 8.46  | 0.1 | 11.09 | 0.0      | 0.0001474 | 0.0001667 | 0.0138413 | 0.0138413 | A         | DT_P01984 | 3476                           | cm1(Hypothetical protein 3476) |
| YGI | -2.84 | 10.27 | -1.06 | 11.15 | 0.1 | 10.09 | 0.1      | 0.0001494 | 0.0001689 | 0.0139821 | 0.0139821 | A         | DT_P01985 | 3477                           | cm1(Hypothetical protein 3477) |
| YGJ | -2.84 | 10.27 | -1.06 | 11.15 | 0.1 | 10.09 | 0.1      | 0.0001494 | 0.0001689 | 0.0139821 | 0.0139821 | A         | DT_P01986 | 3478                           | cm1(Hypothetical protein 3478) |
| YGK | -2.84 | 10.27 | -1.06 | 11.15 | 0.1 | 10.09 | 0.1      | 0.0001494 | 0.0001689 | 0.0139821 | 0.0139821 | A         | DT_P01987 | 3479                           | cm1(Hypothetical protein 3479) |
| YGL | -2.84 | 10.27 | -1.06 | 11.15 | 0.1 | 10.09 | 0.1      | 0.0001494 | 0.0001689 | 0.0139821 | 0.0139821 | A         | DT_P01988 | 3480                           | cm1(Hypothetical protein 3480) |
| YGM | -2.84 | 10.27 | -1.06 | 11.15 | 0.1 | 10.09 | 0.1      | 0.0001494 | 0.0001689 | 0.0139821 | 0.0139821 | A         | DT_P01989 | 3481                           | cm1(Hypothetical protein 3481) |
| YGN | -2.84 | 10.27 | -1.06 | 11.15 | 0.1 | 10.09 | 0.1      | 0.0001494 | 0.0001689 | 0.0139821 | 0.0139821 | A         | DT_P01990 | 3482                           | cm1(Hypothetical protein 3482) |
| YGO | -2.84 | 10.27 | -1.06 | 11.15 | 0.1 | 10.09 | 0.1      | 0.0001494 | 0.0001689 | 0.0139821 | 0.0139821 | A         | DT_P01991 | 3483                           | cm1(Hypothetical protein 3483) |
| YGP | -2.84 | 10.27 | -1.06 | 11.15 | 0.1 | 10.09 | 0.1      | 0.0001494 | 0.0001689 | 0.0139821 | 0.0139821 | A         | DT_P01992 | 3484                           | cm1(Hypothetical protein 3484) |
| YGQ | -2.84 | 10.27 | -1.06 | 11.15 | 0.1 | 10.09 | 0.1      | 0.0001494 | 0.0001689 | 0.0139821 | 0.0139821 | A         | DT_P01993 | 3485                           | cm1(Hypothetical protein 3485) |
| YGR | -2.84 | 10.27 | -1.06 | 11.15 | 0.1 | 10.09 | 0.1      | 0.0001494 | 0.0001689 | 0.0139821 | 0.0139821 | A         | DT_P01994 | 3486                           | cm1(Hypothetical protein 3486) |
| YGS | -2.84 | 10.27 | -1.06 | 11.15 | 0.1 | 10.09 | 0.1      | 0.0001494 | 0.0001689 | 0.0139821 | 0.0139821 | A         | DT_P01995 | 3487                           | cm1(Hypothetical protein 3487) |
| YGT | -2.84 | 10.27 | -1.06 | 11.15 | 0.1 | 10.09 | 0.1      | 0.0001494 | 0.0001689 | 0.0139821 | 0.0139821 | A         | DT_P01996 | 3488                           | cm1(Hypothetical protein 3488) |
| YGU | -2.84 | 10.27 | -1.06 | 11.15 | 0.1 | 10.09 | 0.1      | 0.0001494 | 0.0001689 | 0.0139821 | 0.0139821 | A         | DT_P01997 | 3489                           | cm1(Hypothetical protein 3489) |
| YGV | -2.84 | 10.27 | -1.06 | 11.15 | 0.1 | 10.09 | 0.1      | 0.0001494 | 0.0001689 | 0.0139821 | 0.0139821 | A         | DT_P01998 | 3490                           | cm1(Hypothetical protein 3490) |
| YGW | -2.84 | 10.27 | -1.06 | 11.15 | 0.1 | 10.09 | 0.1      | 0.0001494 | 0.0001689 | 0.0139821 | 0.0139821 | A         | DT_P01999 | 3491                           | cm1(Hypothetical protein 3491) |
| YGX | -2.84 | 10.27 | -1.06 | 11.15 | 0.1 | 10.09 | 0.1      | 0.0001494 | 0.0001689 | 0.0139821 | 0.0139821 | A         | DT_P02000 | 3492                           | cm1(Hypothetical protein 3492) |
| YGY | -2.84 | 10.27 | -1.06 | 11.15 | 0.1 | 10.09 | 0.1      | 0.0001494 | 0.0001689 | 0.0139821 | 0.0139821 | A         | DT_P02001 | 3493                           | cm1(Hypothetical protein 3493) |
| YGZ | -2.84 | 10.27 | -1.06 | 11.15 | 0.1 | 10.09 | 0.1      | 0.0001494 | 0.0001689 | 0.0139821 | 0.0139821 | A         | DT_P02002 | 3494                           | cm1(Hypothetical protein 3494) |
| YHA | -2.84 | 10.27 | -1.06 | 11.15 | 0.1 | 10.09 | 0.1      | 0.0001494 | 0.0001689 | 0.0139821 | 0.0139821 | A         | DT_P02003 | 3495                           | cm1(Hypothetical protein 3495) |
| YHB | -2.84 | 10.27 | -1.06 | 11.15 | 0.1 | 10.09 | 0.1      | 0.0001494 | 0.0001689 | 0.0139821 | 0.0139821 | A         | DT_P02004 | 3496                           | cm1(Hypothetical protein 3496) |
| YHC | -2.84 | 10.27 | -1.06 | 11.15 | 0.1 | 10.09 | 0.1      | 0.0001494 | 0.0001689 | 0.0139821 | 0.0139821 | A         | DT_P02005 | 3497                           | cm1(Hypothetical protein 3497) |
| YHD | -2.84 | 10.27 | -1.06 | 11.15 | 0.1 | 10.09 | 0.1      | 0.0001494 | 0.0001689 | 0.0139821 | 0.0139821 | A         | DT_P02006 | 3498                           | cm1(Hypothetical protein 3498) |
| YHE | -2.84 | 10.27 | -1.06 | 11.15 | 0.1 | 10.09 | 0.1      | 0.0001494 | 0.0001689 | 0.0139821 | 0.0139821 | A         | DT_P02007 | 3499                           | cm1(Hypothetical protein 3499) |
| YHF | -2.84 | 10.27 | -1.06 | 11.15 | 0.1 | 10.09 | 0.1      | 0.0001494 | 0.0001689 | 0.0139821 | 0.0139821 | A         | DT_P02008 | 3500                           | cm1(Hypothetical protein 3500) |
| YHG | -2.84 | 10.27 | -1.06 | 11.15 | 0.1 | 10.09 | 0.1      | 0.0001494 | 0.0001689 | 0.0139821 | 0.0139821 | A         | DT_P02009 | 3501                           | cm1(Hypothetical protein 3501) |
| YHI | -2.84 | 10.27 | -1.06 | 11.15 | 0.1 | 10.09 | 0.1      | 0.0001494 | 0.0001689 | 0.0139821 | 0.0139821 | A         | DT_P02010 | 3502                           | cm1(Hypothetical protein 3502) |
| YHJ | -2.84 | 10.27 | -1.06 | 11.15 | 0.1 | 10.09 | 0.1      | 0.0001494 | 0.0001689 | 0.0139821 | 0.0139821 | A         | DT_P02011 | 3503                           | cm1(Hypothetical protein 3503) |
| YHK | -2.84 | 10.27 | -1.06 | 11.15 | 0.1 | 10.09 | 0.1      | 0.0001494 | 0.0001689 | 0.0139821 | 0.0139821 | A         | DT_P02012 | 3504                           | cm1(Hypothetical protein 3504) |
| YHL | -2.84 | 10.27 | -1.06 | 11.15 | 0.1 | 10.09 | 0.1      | 0.0001494 | 0.0001689 | 0.0139821 | 0.0139821 | A         | DT_P02013 | 3505                           | cm1(Hypothetical protein 3505) |
| YHM | -2.84 | 10.27 | -1.06 | 11.15 | 0.1 | 10.09 | 0.1      | 0.0001494 | 0.0001689 | 0.0139821 | 0.0139821 | A         | DT_P02014 | 3506                           | cm1(Hypothetical protein 3506) |
| YHN | -2.84 | 10.27 | -1.06 | 11.15 | 0.1 | 10.09 | 0.1      | 0.0001494 | 0.0001689 | 0.0139821 | 0.0139821 | A         | DT_P02015 | 3507                           | cm1(Hypothetical protein 3507) |
| YHO | -2.84 | 10.27 | -1.06 | 11.15 | 0.1 | 10.09 | 0.1      | 0.0001494 | 0.0001689 | 0.0139821 | 0.0139821 | A         | DT_P02016 | 3508                           | cm1(Hypothetical protein 3508) |
| YHP | -2.84 | 10.27 | -1.06 | 11.15 | 0.1 | 10.09 | 0.1      | 0.0001494 | 0.0001689 | 0.0139821 | 0.0139821 | A         | DT_P02017 | 3509                           | cm1(Hypothetical protein 3509) |
| YHQ | -2.84 | 10.27 | -1.06 | 11.15 | 0.1 | 10.09 | 0.1      | 0.0001494 | 0.0001689 | 0.0139821 | 0.0139821 | A         | DT_P02018 | 3510                           | cm1(Hypothetical protein 3510) |
| YHR | -2.84 | 10.27 | -1.06 | 11.15 | 0.1 | 10.09 | 0.1      | 0.0001494 | 0.0001689 | 0.0139821 | 0.0139821 | A         | DT_P02019 | 3511                           | cm1(Hypothetical protein 3511) |
| YHS | -2.84 | 10.27 | -1.06 | 11.15 | 0.1 | 10.09 | 0.1      | 0.0001494 | 0.0001689 | 0.0139821 | 0.0139821 | A         | DT_P02020 | 3512                           | cm1(Hypothetical protein 3512) |
| YHT | -2.84 | 10.27 | -1.06 | 11.15 | 0.1 | 10.09 | 0.1      | 0.0001494 | 0.0001689 | 0.0139821 | 0.0139821 | A         | DT_P02021 | 3513                           | cm1(Hypothetical protein 3513) |
| YHU | -2.84 | 10.27 | -1.06 | 11.15 | 0.1 | 10.09 | 0.1      | 0.0001494 | 0.0001689 | 0.0139821 | 0.0139821 | A         | DT_P02022 | 3514                           | cm1(Hypothetical protein 3514) |
| YHV | -2.84 | 10.27 | -1.06 | 11.15 | 0.1 | 10.09 | 0.1      | 0.0001494 | 0.0001689 | 0.0139821 | 0.0139821 | A         | DT_P02023 | 3515                           | cm1(Hypothetical protein 3515) |
| YHW | -2.84 | 10.27 | -1.06 | 11.15 | 0.1 | 10.09 | 0.1      | 0.0001494 | 0.0001689 | 0.0139821 | 0.0139821 | A         | DT_P02024 | 3516                           | cm1(Hypothetical protein 3516) |
| YHX | -2.84 | 10.27 | -1.06 | 11.15 | 0.1 | 10.09 | 0.1      | 0.0001494 | 0.0001689 | 0.0139821 | 0.0139821 | A         | DT_P02025 | 3517                           | cm1(Hypothetical protein 3517) |
| YHY | -2.84 | 10.27 | -1.06 | 11.15 | 0.1 | 10.09 | 0.1      | 0.0001494 | 0.0001689 | 0.0139821 | 0.0139821 | A         | DT_P02026 | 3518                           | cm1(Hypothetical protein 3518) |
| YHZ | -2.84 | 10.27 | -1.06 | 11.15 | 0.1 | 10.09 | 0.1      | 0.0001494 | 0.0001689 | 0.0139821 | 0.0139821 | A         | DT_P02027 | 3519                           | cm1(Hypothetical protein 3519) |
| YIA | -2.84 | 10.27 | -1.06 | 11.15 | 0.1 | 10.09 | 0.1      | 0.0001494 | 0.0001689 | 0.0139821 | 0.0139821 | A         | DT_P02028 | 3520                           | cm1(Hypothetical protein 3520) |
| YIB | -2.84 | 10.27 | -1.06 | 11.15 | 0.1 | 10.09 | 0.1      | 0.0001494 | 0.0001689 | 0.0139821 | 0.0139821 | A         | DT_P02029 | 3521                           | cm1(H                          |

|     |        |       |        |        |     |        |     |          |          |          |          |             |      |                            |
|-----|--------|-------|--------|--------|-----|--------|-----|----------|----------|----------|----------|-------------|------|----------------------------|
| ymc | 2.84   | 8.76  | 2.57   | 10.28  | 0.3 | 7.28   | 0.1 | 0.000132 | 0.000498 | 0.000187 | 0.100007 | A_07_P04303 | 1831 | cmf(juanes ymcs)           |
| ymc | -2.89  | 8.27  | -1.54  | 7.02   | 0.0 | 8.64   | 0.1 | 0.000100 | 0.000111 | 0.026177 | 0.047604 | A_07_P04303 | 1839 | cmf(juanes ymcs yb2_3_300) |
| ymc | 2.05   | 8.62  | 1.03   | 8.11   | 0.1 | 8.19   | 0.0 | 0.000147 | 0.000106 | 0.000491 | 0.000672 | A_07_P04303 | 1846 | cmf(juanes ymcs yb2_3_300) |
| ymc | 3.21   | 9.25  | 1.49   | 10.09  | 0.0 | 8.61   | 0.4 | 0.000129 | 0.000179 | 0.017269 | 0.017269 | A_07_P04303 | 1848 | cmf(juanes ymcs yb2_3_300) |
| ymc | 2.16   | 8.19  | 0.19   | 8.29   | 0.1 | 8.02   | 0.1 | 0.000143 | 0.000129 | 0.000129 | 0.000129 | A_07_P04303 | 1854 | cmf(juanes ymcs yb2_3_300) |
| ymc | 5.24   | 13.95 | 2.39   | 15.54  | 0.0 | 12.75  | 0.0 | 0.000070 | 0.000177 | 0.000099 | 0.013644 | A_07_P04303 | 1853 | cmf(juanes ymcs yb2_3_300) |
| ymc | -4.11  | 8.66  | 1.48   | 8.48   | 0.1 | 8.02   | 0.0 | 0.000070 | 0.000177 | 0.000099 | 0.013644 | A_07_P04303 | 1857 | cmf(juanes ymcs yb2_3_300) |
| ymc | -1.06  | 8.66  | -0.82  | 7.25   | 0.0 | 10.07  | 0.1 | 0.000039 | 0.000166 | 0.000066 | 0.027083 | A_07_P04303 | 1837 | cmf(juanes ymcs yb2_3_300) |
| ymc | -10.26 | 8.66  | -8.84  | 8.14   | 0.0 | 8.02   | 0.0 | 0.000039 | 0.000166 | 0.000066 | 0.027083 | A_07_P04303 | 1838 | cmf(juanes ymcs yb2_3_300) |
| ymc | -11.26 | 8.66  | -9.84  | 7.52   | 0.1 | 10.79  | 0.0 | 0.000039 | 0.000166 | 0.000066 | 0.027083 | A_07_P04303 | 1839 | cmf(juanes ymcs yb2_3_300) |
| ymc | -12.26 | 8.66  | -10.84 | 6.90   | 0.1 | 13.57  | 0.0 | 0.000039 | 0.000166 | 0.000066 | 0.027083 | A_07_P04303 | 1840 | cmf(juanes ymcs yb2_3_300) |
| ymc | -13.26 | 8.66  | -11.84 | 6.28   | 0.1 | 16.35  | 0.0 | 0.000039 | 0.000166 | 0.000066 | 0.027083 | A_07_P04303 | 1841 | cmf(juanes ymcs yb2_3_300) |
| ymc | -14.26 | 8.66  | -12.84 | 5.66   | 0.1 | 19.13  | 0.0 | 0.000039 | 0.000166 | 0.000066 | 0.027083 | A_07_P04303 | 1842 | cmf(juanes ymcs yb2_3_300) |
| ymc | -15.26 | 8.66  | -13.84 | 5.04   | 0.1 | 21.91  | 0.0 | 0.000039 | 0.000166 | 0.000066 | 0.027083 | A_07_P04303 | 1843 | cmf(juanes ymcs yb2_3_300) |
| ymc | -16.26 | 8.66  | -14.84 | 4.42   | 0.1 | 24.69  | 0.0 | 0.000039 | 0.000166 | 0.000066 | 0.027083 | A_07_P04303 | 1844 | cmf(juanes ymcs yb2_3_300) |
| ymc | -17.26 | 8.66  | -15.84 | 3.80   | 0.1 | 27.47  | 0.0 | 0.000039 | 0.000166 | 0.000066 | 0.027083 | A_07_P04303 | 1845 | cmf(juanes ymcs yb2_3_300) |
| ymc | -18.26 | 8.66  | -16.84 | 3.18   | 0.1 | 30.25  | 0.0 | 0.000039 | 0.000166 | 0.000066 | 0.027083 | A_07_P04303 | 1846 | cmf(juanes ymcs yb2_3_300) |
| ymc | -19.26 | 8.66  | -17.84 | 2.56   | 0.1 | 33.03  | 0.0 | 0.000039 | 0.000166 | 0.000066 | 0.027083 | A_07_P04303 | 1847 | cmf(juanes ymcs yb2_3_300) |
| ymc | -20.26 | 8.66  | -18.84 | 1.94   | 0.1 | 35.81  | 0.0 | 0.000039 | 0.000166 | 0.000066 | 0.027083 | A_07_P04303 | 1848 | cmf(juanes ymcs yb2_3_300) |
| ymc | -21.26 | 8.66  | -19.84 | 1.32   | 0.1 | 38.59  | 0.0 | 0.000039 | 0.000166 | 0.000066 | 0.027083 | A_07_P04303 | 1849 | cmf(juanes ymcs yb2_3_300) |
| ymc | -22.26 | 8.66  | -20.84 | 0.70   | 0.1 | 41.37  | 0.0 | 0.000039 | 0.000166 | 0.000066 | 0.027083 | A_07_P04303 | 1850 | cmf(juanes ymcs yb2_3_300) |
| ymc | -23.26 | 8.66  | -21.84 | 0.08   | 0.1 | 44.15  | 0.0 | 0.000039 | 0.000166 | 0.000066 | 0.027083 | A_07_P04303 | 1851 | cmf(juanes ymcs yb2_3_300) |
| ymc | -24.26 | 8.66  | -22.84 | -0.54  | 0.1 | 46.93  | 0.0 | 0.000039 | 0.000166 | 0.000066 | 0.027083 | A_07_P04303 | 1852 | cmf(juanes ymcs yb2_3_300) |
| ymc | -25.26 | 8.66  | -23.84 | -1.16  | 0.1 | 49.71  | 0.0 | 0.000039 | 0.000166 | 0.000066 | 0.027083 | A_07_P04303 | 1853 | cmf(juanes ymcs yb2_3_300) |
| ymc | -26.26 | 8.66  | -24.84 | -1.78  | 0.1 | 52.49  | 0.0 | 0.000039 | 0.000166 | 0.000066 | 0.027083 | A_07_P04303 | 1854 | cmf(juanes ymcs yb2_3_300) |
| ymc | -27.26 | 8.66  | -25.84 | -2.40  | 0.1 | 55.27  | 0.0 | 0.000039 | 0.000166 | 0.000066 | 0.027083 | A_07_P04303 | 1855 | cmf(juanes ymcs yb2_3_300) |
| ymc | -28.26 | 8.66  | -26.84 | -3.02  | 0.1 | 58.05  | 0.0 | 0.000039 | 0.000166 | 0.000066 | 0.027083 | A_07_P04303 | 1856 | cmf(juanes ymcs yb2_3_300) |
| ymc | -29.26 | 8.66  | -27.84 | -3.64  | 0.1 | 60.83  | 0.0 | 0.000039 | 0.000166 | 0.000066 | 0.027083 | A_07_P04303 | 1857 | cmf(juanes ymcs yb2_3_300) |
| ymc | -30.26 | 8.66  | -28.84 | -4.26  | 0.1 | 63.61  | 0.0 | 0.000039 | 0.000166 | 0.000066 | 0.027083 | A_07_P04303 | 1858 | cmf(juanes ymcs yb2_3_300) |
| ymc | -31.26 | 8.66  | -29.84 | -4.88  | 0.1 | 66.39  | 0.0 | 0.000039 | 0.000166 | 0.000066 | 0.027083 | A_07_P04303 | 1859 | cmf(juanes ymcs yb2_3_300) |
| ymc | -32.26 | 8.66  | -30.84 | -5.50  | 0.1 | 69.17  | 0.0 | 0.000039 | 0.000166 | 0.000066 | 0.027083 | A_07_P04303 | 1860 | cmf(juanes ymcs yb2_3_300) |
| ymc | -33.26 | 8.66  | -31.84 | -6.12  | 0.1 | 71.95  | 0.0 | 0.000039 | 0.000166 | 0.000066 | 0.027083 | A_07_P04303 | 1861 | cmf(juanes ymcs yb2_3_300) |
| ymc | -34.26 | 8.66  | -32.84 | -6.74  | 0.1 | 74.73  | 0.0 | 0.000039 | 0.000166 | 0.000066 | 0.027083 | A_07_P04303 | 1862 | cmf(juanes ymcs yb2_3_300) |
| ymc | -35.26 | 8.66  | -33.84 | -7.36  | 0.1 | 77.51  | 0.0 | 0.000039 | 0.000166 | 0.000066 | 0.027083 | A_07_P04303 | 1863 | cmf(juanes ymcs yb2_3_300) |
| ymc | -36.26 | 8.66  | -34.84 | -7.98  | 0.1 | 80.29  | 0.0 | 0.000039 | 0.000166 | 0.000066 | 0.027083 | A_07_P04303 | 1864 | cmf(juanes ymcs yb2_3_300) |
| ymc | -37.26 | 8.66  | -35.84 | -8.60  | 0.1 | 83.07  | 0.0 | 0.000039 | 0.000166 | 0.000066 | 0.027083 | A_07_P04303 | 1865 | cmf(juanes ymcs yb2_3_300) |
| ymc | -38.26 | 8.66  | -36.84 | -9.22  | 0.1 | 85.85  | 0.0 | 0.000039 | 0.000166 | 0.000066 | 0.027083 | A_07_P04303 | 1866 | cmf(juanes ymcs yb2_3_300) |
| ymc | -39.26 | 8.66  | -37.84 | -9.84  | 0.1 | 88.63  | 0.0 | 0.000039 | 0.000166 | 0.000066 | 0.027083 | A_07_P04303 | 1867 | cmf(juanes ymcs yb2_3_300) |
| ymc | -40.26 | 8.66  | -38.84 | -10.46 | 0.1 | 91.41  | 0.0 | 0.000039 | 0.000166 | 0.000066 | 0.027083 | A_07_P04303 | 1868 | cmf(juanes ymcs yb2_3_300) |
| ymc | -41.26 | 8.66  | -39.84 | -11.08 | 0.1 | 94.19  | 0.0 | 0.000039 | 0.000166 | 0.000066 | 0.027083 | A_07_P04303 | 1869 | cmf(juanes ymcs yb2_3_300) |
| ymc | -42.26 | 8.66  | -40.84 | -11.70 | 0.1 | 96.97  | 0.0 | 0.000039 | 0.000166 | 0.000066 | 0.027083 | A_07_P04303 | 1870 | cmf(juanes ymcs yb2_3_300) |
| ymc | -43.26 | 8.66  | -41.84 | -12.32 | 0.1 | 99.75  | 0.0 | 0.000039 | 0.000166 | 0.000066 | 0.027083 | A_07_P04303 | 1871 | cmf(juanes ymcs yb2_3_300) |
| ymc | -44.26 | 8.66  | -42.84 | -12.94 | 0.1 | 102.53 | 0.0 | 0.000039 | 0.000166 | 0.000066 | 0.027083 | A_07_P04303 | 1872 | cmf(juanes ymcs yb2_3_300) |
| ymc | -45.26 | 8.66  | -43.84 | -13.56 | 0.1 | 105.31 | 0.0 | 0.000039 | 0.000166 | 0.000066 | 0.027083 | A_07_P04303 | 1873 | cmf(juanes ymcs yb2_3_300) |
| ymc | -46.26 | 8.66  | -44.84 | -14.18 | 0.1 | 108.09 | 0.0 | 0.000039 | 0.000166 | 0.000066 | 0.027083 | A_07_P04303 | 1874 | cmf(juanes ymcs yb2_3_300) |
| ymc | -47.26 | 8.66  | -45.84 | -14.80 | 0.1 | 110.87 | 0.0 | 0.000039 | 0.000166 | 0.000066 | 0.027083 | A_07_P04303 | 1875 | cmf(juanes ymcs yb2_3_300) |
| ymc | -48.26 | 8.66  | -46.84 | -15.42 | 0.1 | 113.65 | 0.0 | 0.000039 | 0.000166 | 0.000066 | 0.027083 | A_07_P04303 | 1876 | cmf(juanes ymcs yb2_3_300) |
| ymc | -49.26 | 8.66  | -47.84 | -16.04 | 0.1 | 116.43 | 0.0 | 0.000039 | 0.000166 | 0.000066 | 0.027083 | A_07_P04303 | 1877 | cmf(juanes ymcs yb2_3_300) |
| ymc | -50.26 | 8.66  | -48.84 | -16.66 | 0.1 | 119.21 | 0.0 | 0.000039 | 0.000166 | 0.000066 | 0.027083 | A_07_P04303 | 1878 | cmf(juanes ymcs yb2_3_300) |
| ymc | -51.26 | 8.66  | -49.84 | -17.28 | 0.1 | 121.99 | 0.0 | 0.000039 | 0.000166 | 0.000066 | 0.027083 | A_07_P04303 | 1879 | cmf(juanes ymcs yb2_3_300) |
| ymc | -52.26 | 8.66  | -50.84 | -17.90 | 0.1 | 124.77 | 0.0 | 0.000039 | 0.000166 | 0.000066 | 0.027083 | A_07_P04303 | 1880 | cmf(juanes ymcs yb2_3_300) |
| ymc | -53.26 | 8.66  | -51.84 | -18.52 | 0.1 | 127.55 | 0.0 | 0.000039 | 0.000166 | 0.000066 | 0.027083 | A_07_P04303 | 1881 | cmf(juanes ymcs yb2_3_300) |
| ymc | -54.26 | 8.66  | -52.84 | -19.14 | 0.1 | 130.33 | 0.0 | 0.000039 | 0.000166 | 0.000066 | 0.027083 | A_07_P04303 | 1882 | cmf(juanes ymcs yb2_3_300) |
| ymc | -55.26 | 8.66  | -53.84 | -19.76 | 0.1 | 133.11 | 0.0 | 0.000039 | 0.000166 | 0.000066 | 0.027083 | A_07_P04303 | 1883 | cmf(juanes ymcs yb2_3_300) |
| ymc | -56.26 | 8.66  | -54.84 | -20.38 | 0.1 | 135.89 | 0.0 | 0.000039 | 0.000166 | 0.000066 | 0.027083 | A_07_P04303 | 1884 | cmf(juanes ymcs yb2_3_300) |
| ymc | -57.26 | 8.66  | -55.84 | -21.00 | 0.1 | 138.67 | 0.0 | 0.000039 | 0.000166 | 0.000066 | 0.027083 | A_07_P04303 | 1885 | cmf(juanes ymcs yb2_3_300) |
| ymc | -58.26 | 8.66  | -56.84 | -21.62 | 0.1 | 141.45 | 0.0 | 0.000039 | 0.000166 | 0.000066 | 0.027083 | A_07_P04303 | 1886 | cmf(juanes ymcs yb2_3_300) |
| ymc | -59.26 | 8.66  | -57.84 | -22.24 | 0.1 | 144.23 | 0.0 | 0.000039 | 0.000166 | 0.000066 | 0.027083 | A_07_P04303 | 1887 | cmf(juanes ymcs yb2_3_300) |
| ymc | -60.26 | 8.66  | -58.84 | -22.86 | 0.1 | 147.01 | 0.0 | 0.000039 | 0.000166 | 0.000066 | 0.027083 | A_07_P04303 | 1888 | cmf(juanes ymcs yb2_3_300) |
| ymc | -61.26 | 8.66  | -59.84 | -23.48 | 0.1 | 149.79 | 0.0 | 0.000039 | 0.000166 | 0.000066 | 0.027083 | A_07_P04303 | 1889 | cmf(juanes ymcs yb2_3_300) |
| ymc | -62.26 | 8.66  | -60.84 | -24.10 | 0.1 | 152.57 | 0.0 | 0.000039 | 0.000166 | 0.000066 | 0.027083 | A_07_P04303 | 1890 | cmf(juanes ymcs yb2_3_300) |
| ymc | -63.26 | 8.66  | -61.84 | -24.72 | 0.1 | 155.35 | 0.0 | 0.000039 | 0.000166 | 0.000066 | 0.027083 | A_07_P04303 | 1891 | cmf(juanes ymcs yb2_3_300) |
| ymc | -64.26 | 8.66  | -62.84 | -25.34 | 0.1 | 158.13 | 0.0 | 0.000039 | 0.000166 | 0.000066 | 0.027083 | A_07_P04303 | 1892 | cmf(juanes ymcs yb2_3_300) |
| ymc | -65.26 | 8.66  | -63.84 | -25.96 | 0.1 | 160.91 | 0.0 | 0.000039 | 0.000166 | 0.000066 | 0.027083 | A_07_P04303 | 1893 | cmf(juanes ymcs yb2_3_300) |
| ymc | -66.26 | 8.66  | -64.84 | -26.58 | 0.1 | 163.69 | 0.0 | 0.000039 | 0.000166 | 0.000066 | 0.027083 | A_07_P04303 | 1894 | cmf(juanes ymcs yb2_3_300) |
| ymc | -67.26 | 8.66  | -65.84 | -27.20 | 0.1 | 166.47 | 0.0 | 0.000039 | 0.000166 | 0.000066 | 0.027083 | A_07_P04303 | 1895 | cmf(juanes ymcs yb2_3_300) |
| ymc | -68.26 | 8.66  | -66.84 | -27.82 | 0.1 | 169.25 | 0.0 | 0.000039 | 0.000166 | 0.000066 | 0.027083 | A_07_P04303 | 1896 | cmf(juanes ymcs yb2_3_300) |
| ymc | -69.26 | 8.66  | -67.84 | -28.44 | 0.1 | 172.03 | 0.0 | 0.000039 | 0.000166 | 0.000066 | 0.027083 | A_07_P04303 | 1897 | cmf(juanes ymcs yb2_3_300) |
| ymc | -70.26 | 8.66  | -68.84 | -29.06 | 0.1 | 174.81 | 0.0 | 0.000039 | 0.000166 | 0.000066 | 0.027083 | A_07_P04303 | 1898 | cmf(juanes ymcs yb2_3_300) |
| ymc | -71.26 | 8.66  | -69.84 | -29.68 | 0.1 | 177.59 | 0.0 | 0.000039 | 0.000166 | 0.000066 | 0.027083 | A_07_P04303 | 1899 | cmf(juanes ymcs yb2_3_300) |
| ymc | -72.26 | 8.66  | -70.84 | -30.30 | 0.1 | 180.37 | 0.0 | 0.000039 | 0.000166 | 0.000066 | 0.027083 | A_07_P04303 | 1900 | cmf(juanes ymcs yb2_3_300) |
| ymc | -73.26 | 8.66  | -7     |        |     |        |     |          |          |          |          |             |      |                            |

|       |        |       |        |       |     |       |     |           |           |           |           |   |           |       |                                                                   |
|-------|--------|-------|--------|-------|-----|-------|-----|-----------|-----------|-----------|-----------|---|-----------|-------|-------------------------------------------------------------------|
| 24040 | -3.21  | 11.79 | 1.88   | 12.83 | 0.0 | 10.90 | 0.0 | 0.0000000 | 0.0001298 | 0.0243817 | 0.0750483 | A | DT_P04003 | 24040 | cmr[actin] protein encoded by LOC102481                           |
| 24043 | -1.58  | 10.15 | -1.37  | 8.46  | 0.2 | 10.93 | 0.1 | 0.0001300 | 0.0001015 | 0.0247085 | 0.0400580 | A | DT_P04004 | 24043 | cmr[actin] nonmuscle protein 234145 [24043]                       |
| 24046 | 2.24   | 8.89  | 1.74   | 9.95  | 0.0 | 7.25  | 0.0 | 0.0000000 | 0.0000000 | 0.0100000 | 0.0000000 | A | DT_P04005 | 24046 | cmr[actin] ATP binding protein of PAK1 transporter family [24046] |
| 24050 | -3.03  | 13.62 | 1.42   | 13.59 | 0.1 | 13.11 | 0.4 | 0.0007714 | 0.0037609 | 0.0306428 | 0.1248284 | A | DT_P04006 | 24050 | cmr[actin] unknown function [24050]                               |
| 24050 | -3.06  | 13.64 | 1.42   | 14.41 | 0.0 | 12.83 | 0.0 | 0.0000000 | 0.0001242 | 0.0181766 | 0.0300771 | A | DT_P04006 | 24050 | cmr[actin] unknown function [24050]                               |
| 24050 | -4.17  | 13.17 | 2.06   | 14.20 | 0.0 | 13.14 | 0.3 | 0.0001044 | 0.0011820 | 0.0003007 | 0.0200667 | A | DT_P04006 | 24050 | cmr[actin] unknown function [24050]                               |
| 24050 | 6.44   | 13.86 | 2.64   | 10.21 | 1.0 | 12.32 | 0.1 | 0.0000000 | 0.0170000 | 0.0000000 | 0.0100000 | A | DT_P04006 | 24050 | cmr[actin] unknown function [24050]                               |
| 24050 | -2.71  | 13.60 | 1.44   | 14.32 | 0.0 | 12.88 | 0.1 | 0.0000000 | 0.0001200 | 0.0212701 | 0.0198716 | A | DT_P04006 | 24050 | cmr[actin] unknown function [24050]                               |
| 24057 | -1.87  | 7.66  | -1.81  | 8.48  | 0.0 | 8.63  | 0.0 | 0.0000000 | 0.0000000 | 0.0000000 | 0.0000000 | A | DT_P04006 | 24057 | cmr[actin] phosphatidylinositol 3-kinase enzyme subunit [24057]   |
| 24068 | -1.70  | 8.05  | -1.89  | 7.70  | 0.1 | 9.60  | 0.0 | 0.0000000 | 0.0001443 | 0.0233770 | 0.0184584 | A | DT_P04010 | 24068 | cmr[actin] unknown function [24068]                               |
| 24069 | 10.28  | 11.75 | 1.44   | 14.12 | 0.0 | 8.63  | 0.1 | 0.0000000 | 0.0000000 | 0.0000000 | 0.0000000 | A | DT_P04010 | 24069 | cmr[actin] unknown function [24069]                               |
| 24069 | -1.48  | 8.47  | -1.41  | 7.74  | 0.2 | 9.18  | 0.1 | 0.0000000 | 0.0000000 | 0.0000000 | 0.0000000 | A | DT_P04010 | 24069 | cmr[actin] ATP-dependent DNA kinase [24069]                       |
| 24070 | -1.13  | 7.76  | -1.22  | 7.14  | 0.1 | 8.30  | 0.1 | 0.0000000 | 0.0000000 | 0.0000000 | 0.0000000 | A | DT_P04010 | 24070 | cmr[actin] ATP-dependent DNA kinase [24070]                       |
| 24070 | 2.89   | 8.46  | 1.06   | 8.89  | 0.0 | 7.93  | 0.0 | 0.0000000 | 0.0000000 | 0.0000000 | 0.0000000 | A | DT_P04010 | 24070 | cmr[actin] D-type protein [24070]                                 |
| 24074 | 3.16   | 10.51 | 1.46   | 11.04 | 0.0 | 9.38  | 0.1 | 0.0007843 | 0.0010035 | 0.0100000 | 0.0175821 | A | DT_P04017 | 24074 | cmr[actin] actin carrier protein [24074]                          |
| 24082 | -1.64  | 7.67  | -1.28  | 6.80  | 0.0 | 8.12  | 0.2 | 0.0000000 | 0.0000000 | 0.0000000 | 0.0000000 | A | DT_P04020 | 24082 | cmr[actin] unknown function [24082]                               |
| 24082 | -1.88  | 7.68  | -1.52  | 8.47  | 0.1 | 8.50  | 0.1 | 0.0001423 | 0.0010009 | 0.0201124 | 0.0071014 | A | DT_P04020 | 24082 | cmr[actin] 3' UTR [24082]                                         |
| 24084 | -12.11 | 7.07  | -10.27 | 7.12  | 0.2 | 8.20  | 0.2 | 0.0000000 | 0.0000000 | 0.0000000 | 0.0000000 | A | DT_P04020 | 24084 | cmr[actin] unknown function [24084]                               |
| 24075 | -1.40  | 7.68  | -1.26  | 7.06  | 0.2 | 8.12  | 0.2 | 0.0000000 | 0.0001420 | 0.0000000 | 0.0112078 | A | DT_P04020 | 24075 | cmr[actin] phosphatidylinositol 3-kinase enzyme subunit [24075]   |
| 24076 | 2.43   | 7.96  | -1.26  | 8.05  | 0.1 | 8.25  | 0.4 | 0.0000000 | 0.0000000 | 0.0000000 | 0.0000000 | A | DT_P04020 | 24076 | cmr[actin] unknown function [24076]                               |
| 24089 | -3.09  | 10.55 | 1.07   | 11.08 | 0.1 | 10.01 | 0.1 | 0.0018900 | 0.0018026 | 0.0407100 | 0.0400000 | A | DT_P04028 | 24089 | cmr[actin] unknown function [24089]                               |
| 24090 | 1.60   | 9.96  | -1.88  | 10.83 | 0.2 | 9.61  | 0.1 | 0.0000000 | 0.0000000 | 0.0000000 | 0.0000000 | A | DT_P04030 | 24090 | cmr[actin] unknown function [24090]                               |
| 24099 | -2.80  | 7.96  | -1.53  | 8.70  | 0.1 | 7.17  | 0.2 | 0.0000000 | 0.0000000 | 0.0000000 | 0.0000000 | A | DT_P04048 | 24099 | cmr[actin] unknown function [24099]                               |
| 24099 | -1.80  | 7.96  | -1.27  | 8.10  | 0.0 | 8.10  | 0.0 | 0.0000000 | 0.0000000 | 0.0000000 | 0.0000000 | A | DT_P04048 | 24099 | cmr[actin] unknown function [24099]                               |
| 24100 | 2.29   | 7.76  | 1.26   | 8.86  | 0.0 | 7.88  | 0.0 | 0.0000000 | 0.0000000 | 0.0000000 | 0.0000000 | A | DT_P04050 | 24100 | cmr[actin] unknown function [24100]                               |
| 24100 | -3.39  | 11.68 | -1.76  | 13.56 | 0.1 | 10.80 | 0.0 | 0.0000000 | 0.0000000 | 0.0000000 | 0.0000000 | A | DT_P04050 | 24100 | cmr[actin] unknown function [24100]                               |
| 24101 | 0.82   | 11.79 | 1.86   | 12.32 | 0.0 | 10.86 | 0.0 | 0.0000000 | 0.0000000 | 0.0000000 | 0.0000000 | A | DT_P04050 | 24101 | cmr[actin] unknown function [24101]                               |
| 24118 | 2.04   | 7.57  | 1.03   | 8.09  | 0.1 | 7.06  | 0.3 | 0.0000000 | 0.0000000 | 0.0000000 | 0.0000000 | A | DT_P04074 | 24118 | cmr[actin] 5' UTR [24118]                                         |
| 24121 | -13.11 | 13.85 | -10.31 | 10.25 | 0.0 | 11.25 | 0.1 | 0.0000000 | 0.0000000 | 0.0000000 | 0.0000000 | A | DT_P04081 | 24121 | cmr[actin] unknown function [24121]                               |
| 24086 | -3.07  | 10.59 | 1.05   | 11.11 | 0.0 | 10.06 | 0.3 | 0.0000000 | 0.0000000 | 0.0000000 | 0.0000000 | A | DT_P04086 | 24086 | cmr[actin] unknown function [24086]                               |
| 24089 | -2.29  | 8.36  | -1.81  | 8.96  | 0.0 | 7.70  | 0.2 | 0.0000000 | 0.0000000 | 0.0000000 | 0.0000000 | A | DT_P04089 | 24089 | cmr[actin] ATP-dependent kinase [24089]                           |
| 24090 | -1.80  | 8.55  | -1.81  | 7.23  | 0.0 | 10.08 | 0.1 | 0.0000000 | 0.0000000 | 0.0000000 | 0.0000000 | A | DT_P04089 | 24090 | cmr[actin] unknown function [24090]                               |
| 24087 | -4.58  | 8.36  | -2.81  | 7.95  | 0.0 | 9.08  | 0.2 | 0.0000000 | 0.0000000 | 0.0000000 | 0.0000000 | A | DT_P04088 | 24087 | cmr[actin] unknown function [24087]                               |
| 24088 | -1.57  | 8.03  | -2.58  | 7.68  | 0.0 | 10.22 | 0.2 | 0.0000000 | 0.0000000 | 0.0000000 | 0.0000000 | A | DT_P04081 | 24088 | cmr[actin] unknown function [24088]                               |
| 24088 | -4.83  | 8.42  | -2.69  | 7.18  | 0.2 | 8.42  | 0.1 | 0.0000000 | 0.0000000 | 0.0000000 | 0.0000000 | A | DT_P04081 | 24088 | cmr[actin] unknown function [24088]                               |
| 24088 | -1.07  | 8.71  | -2.34  | 7.55  | 0.1 | 9.90  | 0.0 | 0.0000000 | 0.0000000 | 0.0000000 | 0.0000000 | A | DT_P04081 | 24088 | cmr[actin] unknown function [24088]                               |
| 24088 | -1.81  | 8.61  | -2.69  | 7.18  | 0.1 | 10.14 | 0.1 | 0.0000000 | 0.0000000 | 0.0000000 | 0.0000000 | A | DT_P04081 | 24088 | cmr[actin] unknown function [24088]                               |
| 24088 | -4.84  | 8.01  | -2.50  | 7.88  | 0.0 | 10.38 | 0.0 | 0.0000000 | 0.0000000 | 0.0000000 | 0.0000000 | A | DT_P04081 | 24088 | cmr[actin] unknown function [24088]                               |
| 24024 | -1.80  | 7.97  | -1.80  | 7.47  | 0.0 | 8.42  | 0.1 | 0.0000000 | 0.0000000 | 0.0000000 | 0.0000000 | A | DT_P04017 | 24024 | cmr[actin] protein encoded by protein group CP-43P [24024]        |
| 24030 | -1.86  | 8.05  | -1.56  | 7.27  | 0.1 | 8.62  | 0.0 | 0.0000000 | 0.0000000 | 0.0000000 | 0.0000000 | A | DT_P04017 | 24030 | cmr[actin] 1st component of cryptosporidium CP-102 [24030]        |
| 24036 | -2.25  | 10.55 | 1.17   | 11.13 | 0.0 | 9.07  | 0.1 | 0.0000000 | 0.0000000 | 0.0000000 | 0.0000000 | A | DT_P04015 | 24036 | cmr[actin] 1st component of cryptosporidium CP-102 [24036]        |
| 24054 | -2.45  | 9.88  | -1.12  | 10.24 | 0.1 | 9.22  | 0.2 | 0.0000000 | 0.0000000 | 0.0000000 | 0.0000000 | A | DT_P04024 | 24054 | cmr[actin] nonmuscle protein 234145 [24054]                       |
| 24060 | -3.77  | 8.11  | -1.92  | 9.46  | 0.4 | 7.15  | 0.7 | 0.0000000 | 0.0000000 | 0.0000000 | 0.0000000 | A | DT_P04062 | 24060 | cmr[actin] D-type protein encoded by protein group CP-10P [24060] |
| 24064 | -1.12  | 8.21  | -1.88  | 8.58  | 0.0 | 9.60  | 0.0 | 0.0000000 | 0.0000000 | 0.0000000 | 0.0000000 | A | DT_P04064 | 24064 | cmr[actin] 2nd component of cryptosporidium CP-102 [24064]        |
| 24070 | -2.70  | 8.23  | -1.94  | 8.80  | 0.0 | 8.60  | 0.1 | 0.0000000 | 0.0000000 | 0.0000000 | 0.0000000 | A | DT_P04068 | 24070 | cmr[actin] ATP-binding component of a transport system [24070]    |
| 24071 | -1.80  | 9.48  | -1.48  | 8.74  | 0.0 | 10.23 | 0.1 | 0.0000000 | 0.0000000 | 0.0000000 | 0.0000000 | A | DT_P04068 | 24071 | cmr[actin] D-type protein encoded by protein group CP-102 [24071] |
